# Supplementary material
Source: PubMed Central journal article supplement (PMC7850058)
Supplement: web_material_kwaa199.pdf [file web_material_kwaa199.pdf]

## **The Chile Biliary Longitudinal Study (Chile BiLS): A Gallstone Cohort**

Jill Koshiol, Vanessa Van De Wyngard, Emma E. McGee, Paz Cook, Ruth M. Pfeiffer, Noldy Mardones, Karie Medina, Vanessa Olivo, Karen Pettit, Sarah S. Jackson, Fabio Paredes, Raúl Sanchez, Andrea Huidobro, Miguel Villaseca, Enrique Bellolio, Hector Losada, Juan Carlos Roa, Allan Hildesheim, Juan Carlos Araya, and Catterina Ferreccio for the Chile BiLS Study Group

Contents:

Web Table 1

**Web Table 1.** Distribution of cholecystectomies conducted to date, by method of detection

| <b>Cholecystectomy Detection Method</b> | <b>Araucanía</b> |          | <b>Molina</b> |          |
|-----------------------------------------|------------------|----------|---------------|----------|
|                                         | <b>No.</b>       | <b>%</b> | <b>No.</b>    | <b>%</b> |
| Review of list of scheduled surgeries   | 552              | 50.5     | 27            | 18.8     |
| Identification by pathology departments | 274              | 25.1     | 43            | 29.9     |
| Perisurgery notice by participant       | 134              | 12.3     | 0             | 0.0      |
| Notification at year 1 or 2 contact     | 60               | 5.5      | 26            | 18.1     |
| Review of Health Service registry       | 47               | 4.3      | 3             | 2.1      |
| Other/unknown                           | 25               | 2.3      | 45            | 31.3     |
